# Supplementary material for: Development of a novel cellular model of Alzheimer’s disease utilizing neurosphere cultures derived from B6C3-Tg(APPswe,PSEN1dE9)85Dbo/J embryonic mouse brain
Source: PubMed Central journal article supplement (PMC4137416; doi:10.1186/2193-1801-3-161), 2014-03-26
Supplement: 40064_2013_1127_MOESM1_ESM.pdf [file 40064_2013_1127_MOESM1_ESM.pdf]

**A**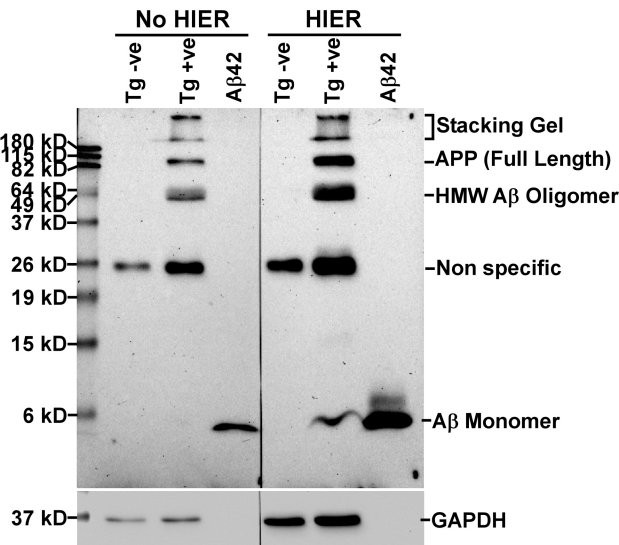**B**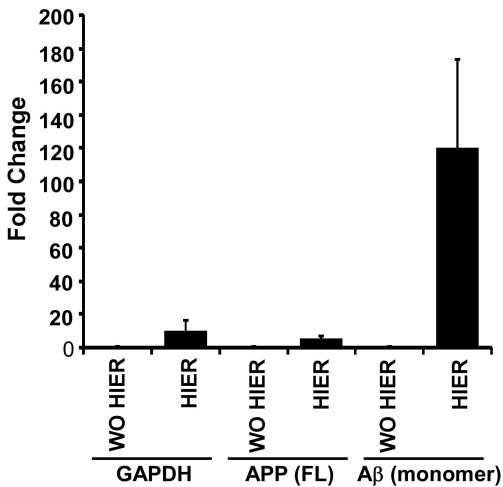

Supplementary Figure 1
